# Supplementary material for: Genomic Prediction of 16 Complex Disease Risks Including Heart Attack, Diabetes, Breast and Prostate Cancer
Source: PubMed Central journal article supplement (PMC6814833; doi:10.1038/s41598-019-51258-x), 2019-10-25

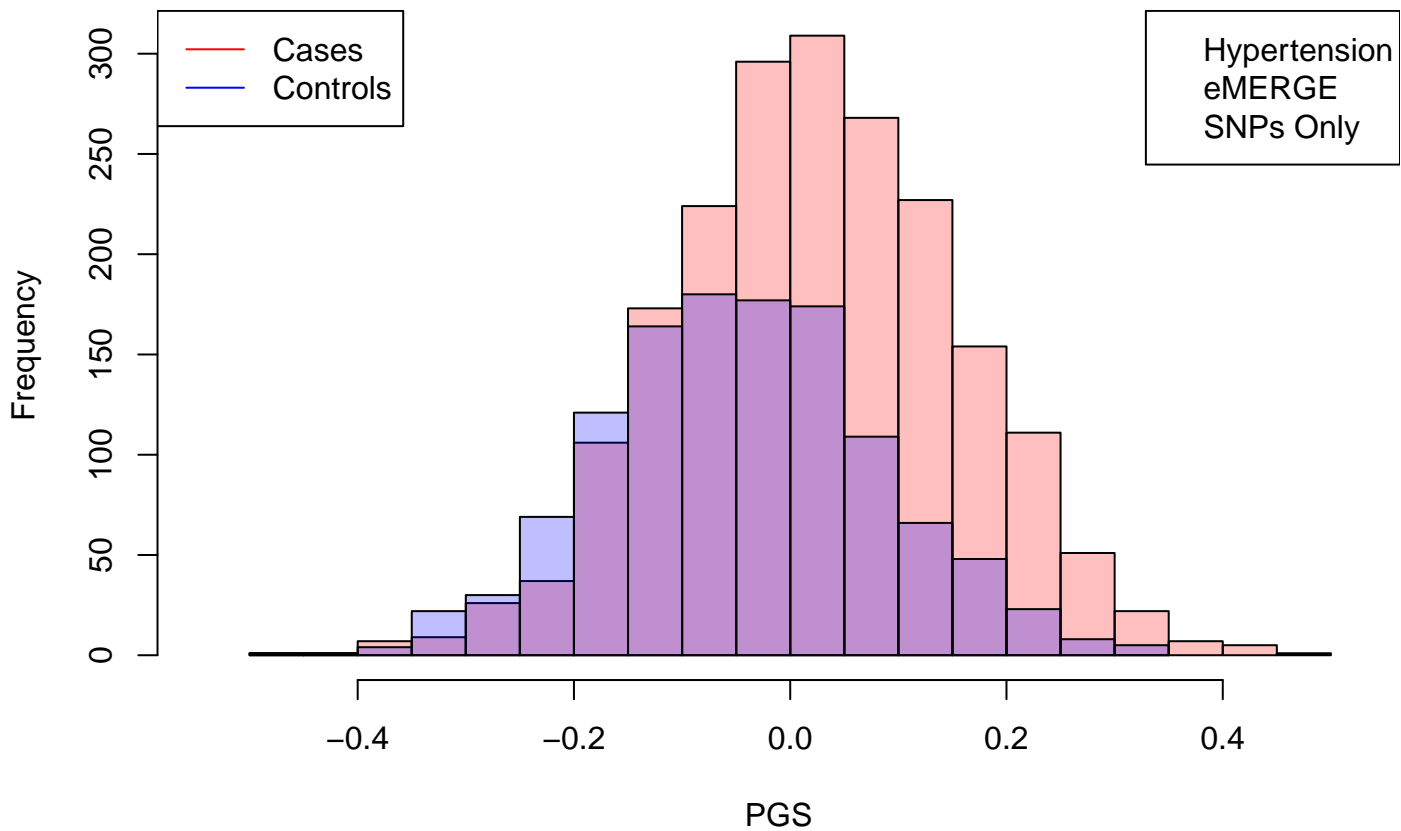

Supplement: 41598_2019_51258_MOESM42_ESM.pdf [file 41598_2019_51258_MOESM42_ESM.pdf]
